# Supplementary material for: Short-branched alkyl sulfobetaine-passivated CsPbBr3 nanocrystals for efficient green light emitting diodes
Source: Royal Society of Chemistry journal article supplement (doi:10.1039/d4nr00965g), 2024-01-01
Supplement: d4nr00965g1.pdf [file d4nr00965g1.pdf]

## 1 Supporting Information

### 2 Short-branched alkyl sulfobetaine passivated CsPbBr<sub>3</sub> nanocrystals 3 for efficient green light emitting diodes

4 Lian-Yue Li<sup>a,b</sup>, Yong-Hui Song<sup>a,b</sup>, Jun-Nan Yang<sup>a,b</sup>, Xue-Chen Ru<sup>a,b</sup>, Yi-Chen Yin<sup>a,b</sup>, Hong-  
5 Bin Yao\*<sup>a,b</sup>

6

7 <sup>a</sup>Hefei National Research Center for Physical Sciences at the Microscale, University of Science  
8 and Technology of China, Hefei, Anhui 230026, China, <sup>b</sup>Department of Applied Chemistry,  
9 Hefei Science Center of Chinese Academy of Sciences, University of Science and Technology  
10 of China, Hefei, Anhui 230026, China

11 E-mail: yhb@ustc.edu.cn

12 Group website: <http://staff.ustc.edu.cn/~yhb/>

13

14 **Materials and Chemicals.** The materials and reagents used were: lead bromide (PbBr<sub>2</sub>, Xi'an  
15 Polymer Light Technology Corp., 99.999%), cesium carbonate (Cs<sub>2</sub>CO<sub>3</sub>, Energy Chemical,  
16 99.9%), 1,3-propane sultone (C<sub>3</sub>H<sub>6</sub>O<sub>3</sub>S, Energy Chemical, 98%), 1,4-butane sultone  
17 (C<sub>4</sub>H<sub>8</sub>O<sub>3</sub>S, Energy Chemical, 98%), tri-n-octylamine (C<sub>24</sub>H<sub>51</sub>N, Sigma-Aldrich, 97%),  
18 trioctylphosphine oxide (TOPO, Strem Chemicals, 90%), diisooctylphosphinic acid (DOPA,  
19 Sigma-Aldrich, 90%), lecithin (C<sub>42</sub>H<sub>80</sub>NO<sub>8</sub>P, Sigma-Aldrich, 97%), deuterated chloroform  
20 (CDCl<sub>3</sub>, Sigma-Aldrich, 99.8 atom % D), acetone (C<sub>3</sub>H<sub>6</sub>O, SCRC, AR), n-octane (C<sub>8</sub>H<sub>18</sub>, Alfa  
21 Aesar, anhydrous 99%), n-hexane (C<sub>6</sub>H<sub>14</sub>, SCRC, AR), ethanol (EtOH, SCRC, 99.7%  
22 anhydrous), Methyl acetate (MeOAc, Alfa Aesar, 99.8% anhydrous), poly(bis(4-phenyl)(2,4,6-  
23 trimethylphenyl) amine) (PTAA, Xi'an 20 Polymer Light Technology Corp.), molybdenum  
24 trioxide (MoO<sub>3</sub>, Fuzhou Invention Photoelectrical 8 Technology, 99.99%), aluminum (Al,  
25 Fuzhou Invention Photoelectrical Technology, 5N), lithium fluoride (LiF, Luminescence  
26 Technology Corp.), 4,6-bis(3,5-di(pyridin-3-yl)phenyl)-2-10methylpyrimidine (B3PymPm,  
27 Luminescence technology corp.), 2,4,6-tris[3-11 (diphenylphosphinyl)phenyl]-1,3,5-triazine  
28 (PO-T2T, Nichem). All reagents were used as received without further purification.

29 **Preparation of PbBr<sub>2</sub> stock solution.** 1 mmol of PbBr<sub>2</sub> and 5 mmol of TOPO was added to  
30 octane (5 mL), sonicated until dissolved, and then diluted with 20 mL hexane.

31 **Preparation of Cs-DOPA stock solution.** 100 mg of Cs<sub>2</sub>CO<sub>3</sub> was added to the mixed solvent  
32 of DOPA (1 mL) and octane (2 mL), sonicated until dissolved, and then diluted with 27 mL

1 hexane.

2 **Preparation of lecithin stock solution.** 0.5 g of lecithin was added to 10 mL hexane, sonicated  
3 until dissolved.

4 **Synthesis of TOAB.** 3-Propanesultone (5 mmol) and trimethylamine (5 mmol) were dissolved  
5 in acetone and heated to 60 °C and kept under reflux for 24 hours. After completion of the  
6 reaction, the acetone is then removed under reduced pressure and a yellow oily liquid is  
7 obtained. The mixture was washed three times with ethyl acetate, and the ethyl acetate was  
8 removed under reduced pressure. After vacuum drying, it was obtained as a white powder.  
9 Yield after purification: 80 %.

10 **Synthesis of SB-n-3.** N,N-Dimethylalkylamine (10 mmol) with different carbon chain length  
11 (n) was dissolved in 15 mL acetone. Subsequently, 1,3-propane sultone (10 mmol) was slowly  
12 added and the mixture was heated to 60 °C and kept under reflux for 24 hours. After completion  
13 of the reaction, the acetone is then removed under reduced pressure and a yellow oily liquid is  
14 obtained. The mixture was washed three times with acetone, and the acetone was removed  
15 under reduced pressure. After vacuum drying, it was obtained as a white powder. Yield after  
16 purification: 90 %.

17 **Determination of charge carrier mobility and trap state density from SCLC**  
18 **measurement.** In the space charge limited current (SCLC) method, the electron-only or hole-  
19 only devices will first exhibit an ohmic behavior, in which current is linearly at low voltage.  
20 When the voltage increases to an inflection point, the devices exhibit the filling process of trap,  
21 in which current exhibits a non-linear rise, and the voltage at the intersection point between the  
22 linear and non-linear region is defined as the trap-filled limit voltage ( $V_{TFL}$ ). The trap state  
23 densities ( $N_{trap}$ ) is determined by using the equation:

24 
$$N_{trap} = \frac{2\epsilon\epsilon_0}{eL^2} V_{TFL}$$

25 where  $\epsilon_0$  is the vacuum permittivity,  $\epsilon$  is the relative permittivity of perovskite (around 22 for  
26 CsPbBr<sub>3</sub>),  $V_{TFL}$  is the trap-filled-limit voltage,  $e$  is the elementary charge, and  $L$  is the thickness  
27 of perovskite film. The values of carrier mobility ( $\mu$ ) are calculated from the Child region (after  
28 the trap-filled limit region) according to Mott-Gurney's equation:

1

$$\mu = \frac{8J_D L^3}{9\varepsilon\varepsilon_0 V^2}$$

2 where  $J_D$  is the current density and  $V$  is the applied voltage.

## 1 Tables and Figures

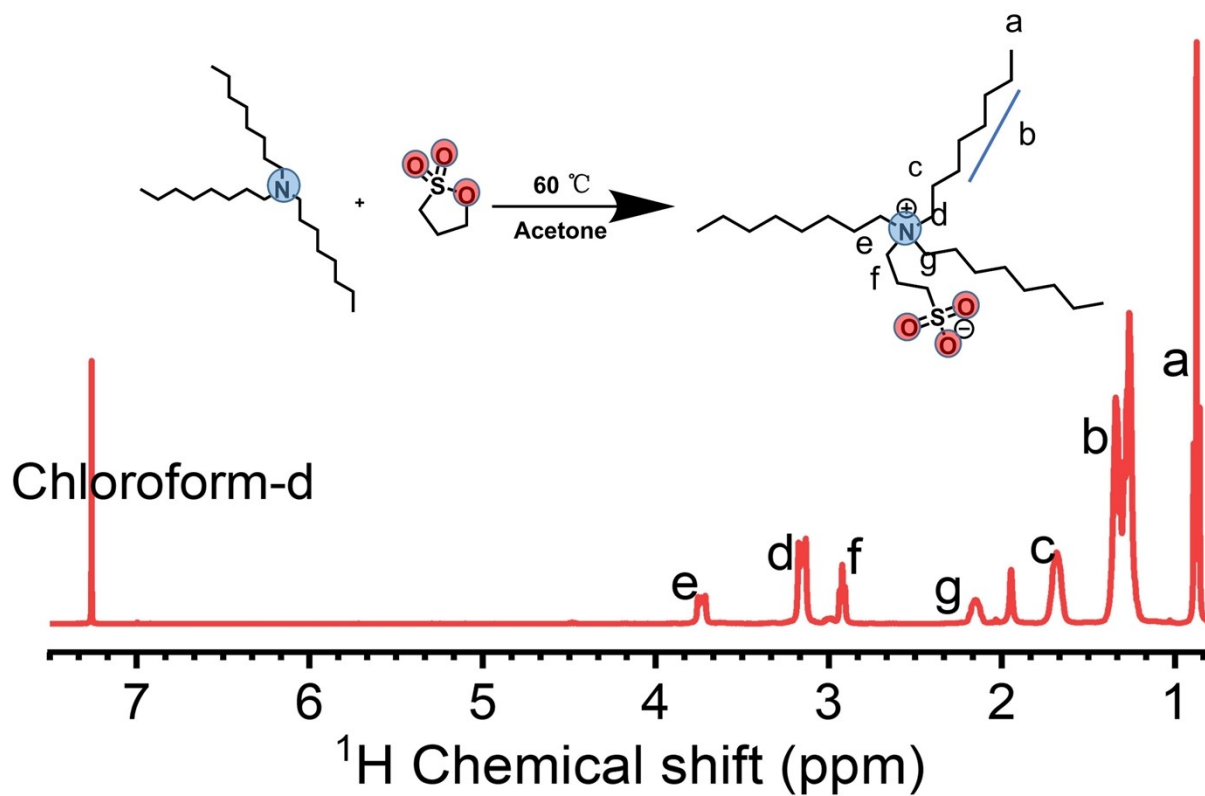

2

3 **Figure S1.**  $^1\text{H}$  liquid-state NMR spectrum of TOAB dispersed in deuterated chloroform  
4 ( $\text{CDCl}_3$ ). The inset shows the corresponding synthetic scheme.

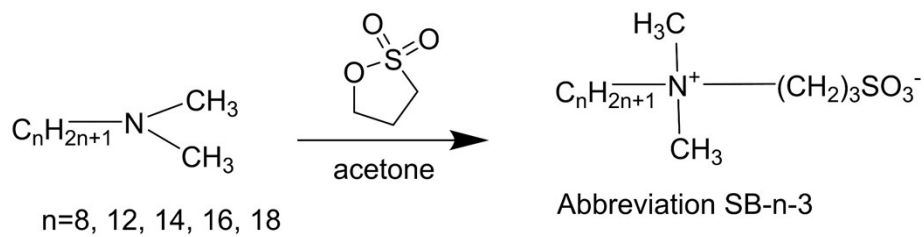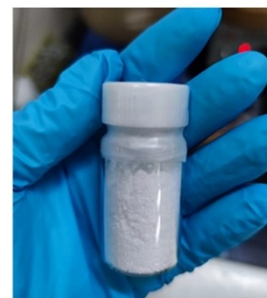

1

2 **Figure S2.** Summary of the synthesis of a series of long-chain sulfobetaine ligand.

3

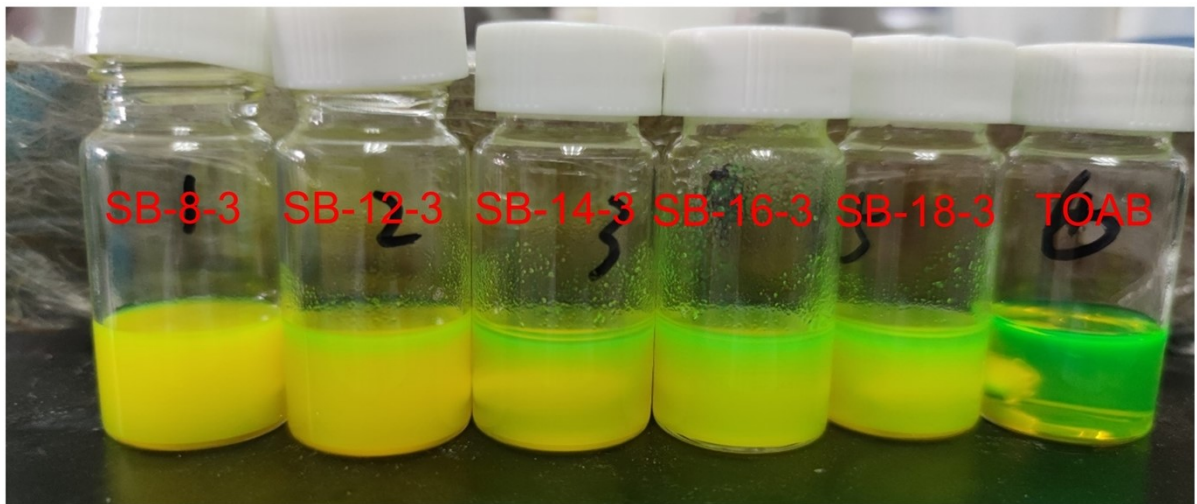

1  
2  
3  
4  
5  
6  
7  
8  
9  
10  
11  
12  
13  
14  
15  
16  
17  
18  
19  
20  
21  
22  
23  
24  
25

**Figure S3.** A photo of CsPbBr<sub>3</sub> NCs obtained by employing a variety of sulfobetaine-based ligands.

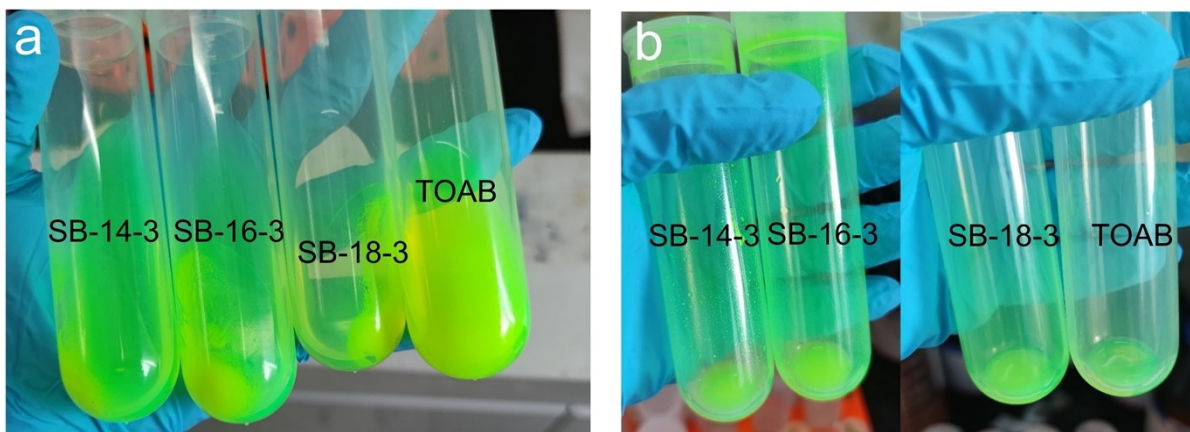

1

2

3 **Figure S4.** Photographs of CsPbBr<sub>3</sub> NCs synthesized by using several representative  
4 sulfobetaine-type ligands that were purified and post-treated with the polar solvent methyl  
5 acetate. (a) Addition of three times the volume of methyl acetate of the stock solution followed  
6 by high-speed centrifugation (10000 rpm for 5 min). (b) Upon adding 400 µL of n-octane  
7 dispersion, only CsPbBr<sub>3</sub> NCs passivated by TOAB can be dispersed.

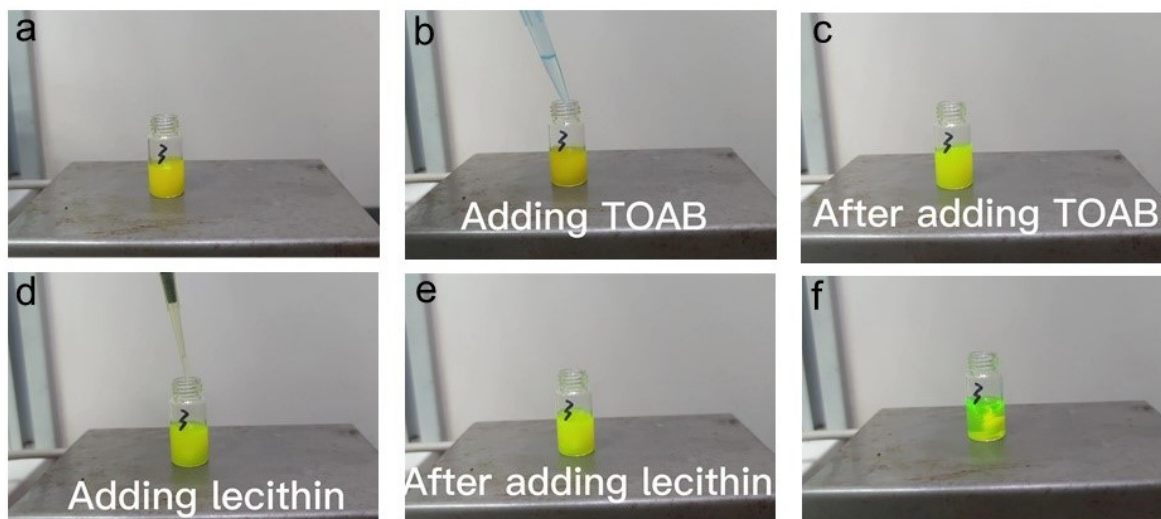

1

2 **Figure S5.** Photographs of several key steps of the ligand exchange process for CsPbBr<sub>3</sub> NCs.  
3 (a) After the formation of CsPbBr<sub>3</sub> NCs, (b) the addition of TOAB, (c) after the addition of  
4 TOAB, (d) the addition of lecithin, (e) after the addition of lecithin, and (f) the resulting clear  
5 and transparent NCs solution after ligand exchange.

6

7

8

9

10

11

12

13

14

15

16



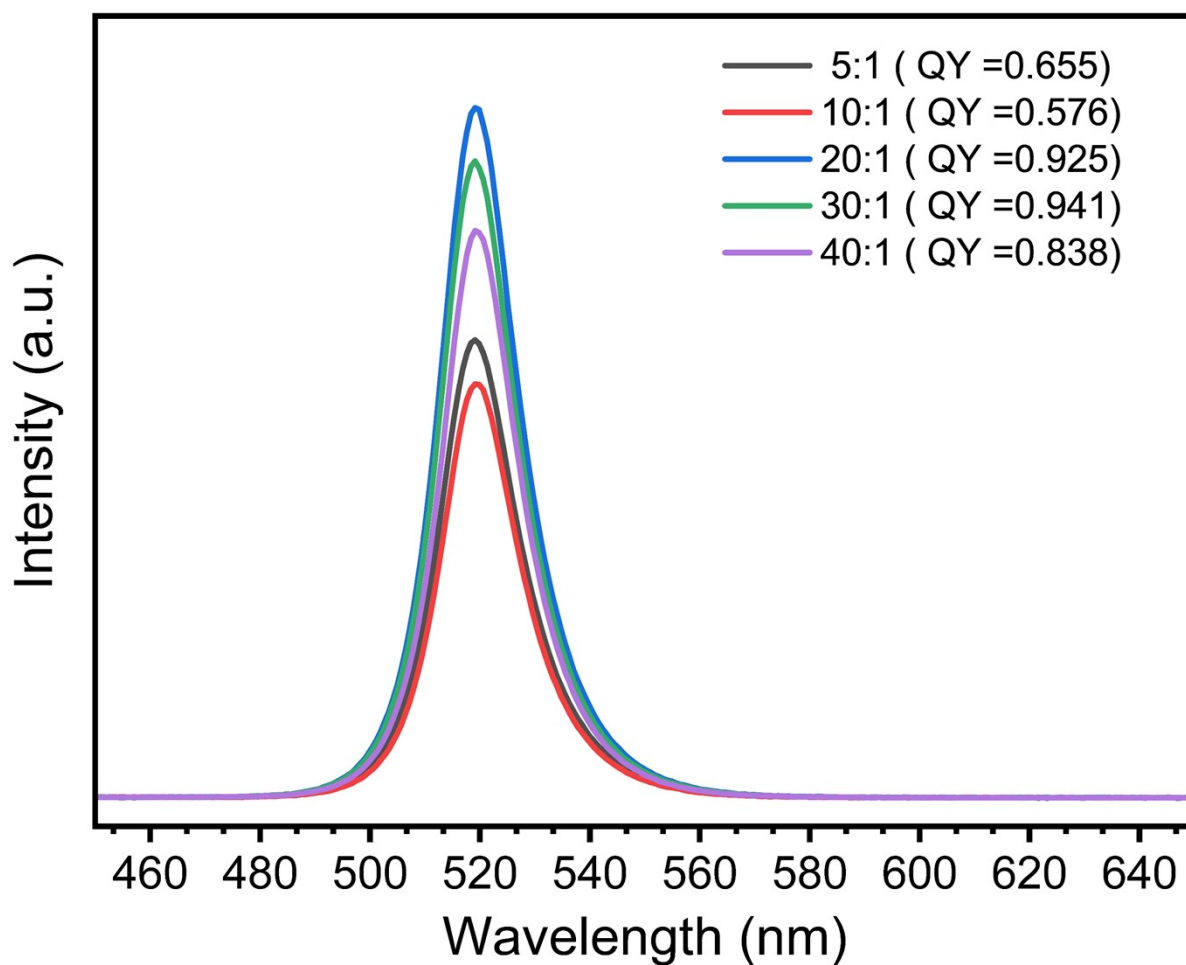

1  
2  
3  
4  
5  
6  
7  
8

**Figure S6.** PL spectra of TOAB passivated NCs with different TOAB:lecithin ratios during ligand exchange (excitation wavelength 365 nm).

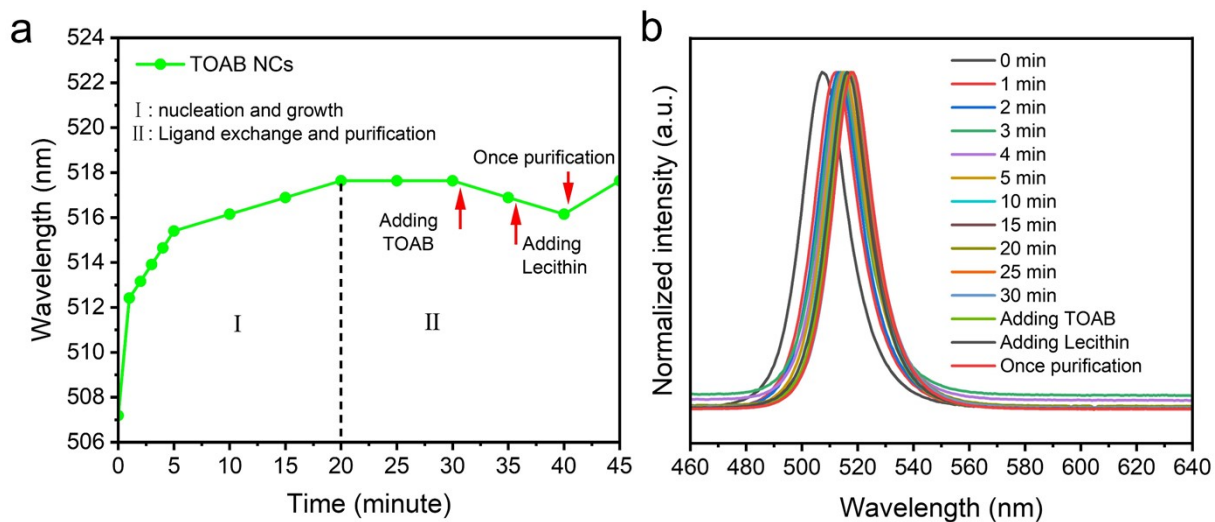

1

2 **Figure S7.** Nucleation and growth stage and ligand exchange stage in TOAB passivated NCs.

3 (a) Changes in PL peak positions during nucleation and growth and ligand exchange in CsPbBr<sub>3</sub>

4 NCs. (b) Normalized PL spectra of CsPbBr<sub>3</sub> NCs obtained at different times during nucleation

5 and growth stage and ligand exchange stage.

6

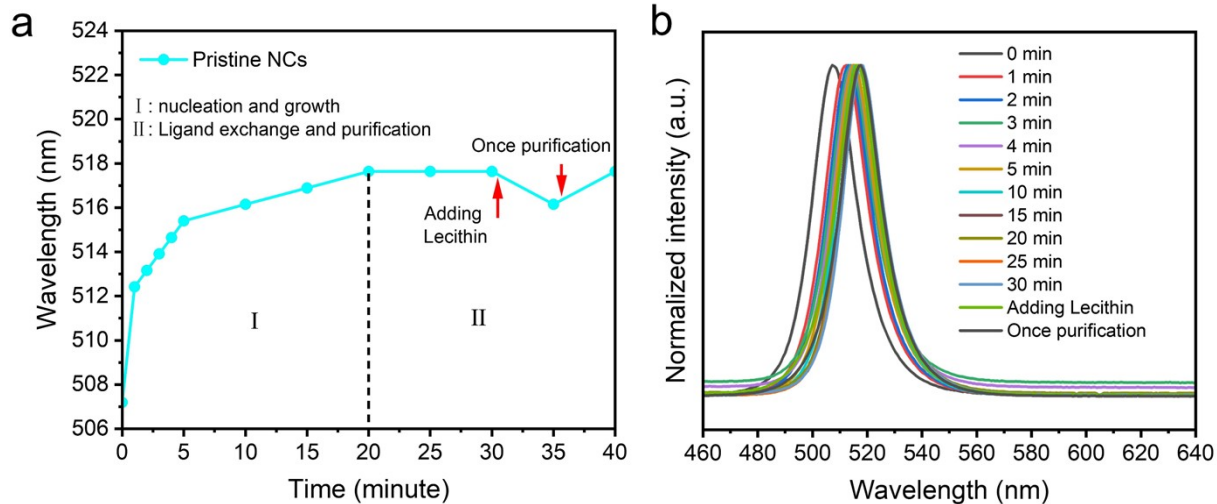

1

2 **Figure S8.** Nucleation and growth stage and ligand exchange stage in pristine NCs. (a) Changes  
 3 in PL peak positions of CsPbBr<sub>3</sub> NCs. (b) Normalized PL spectra of CsPbBr<sub>3</sub> NCs obtained at  
 4 different times.

5

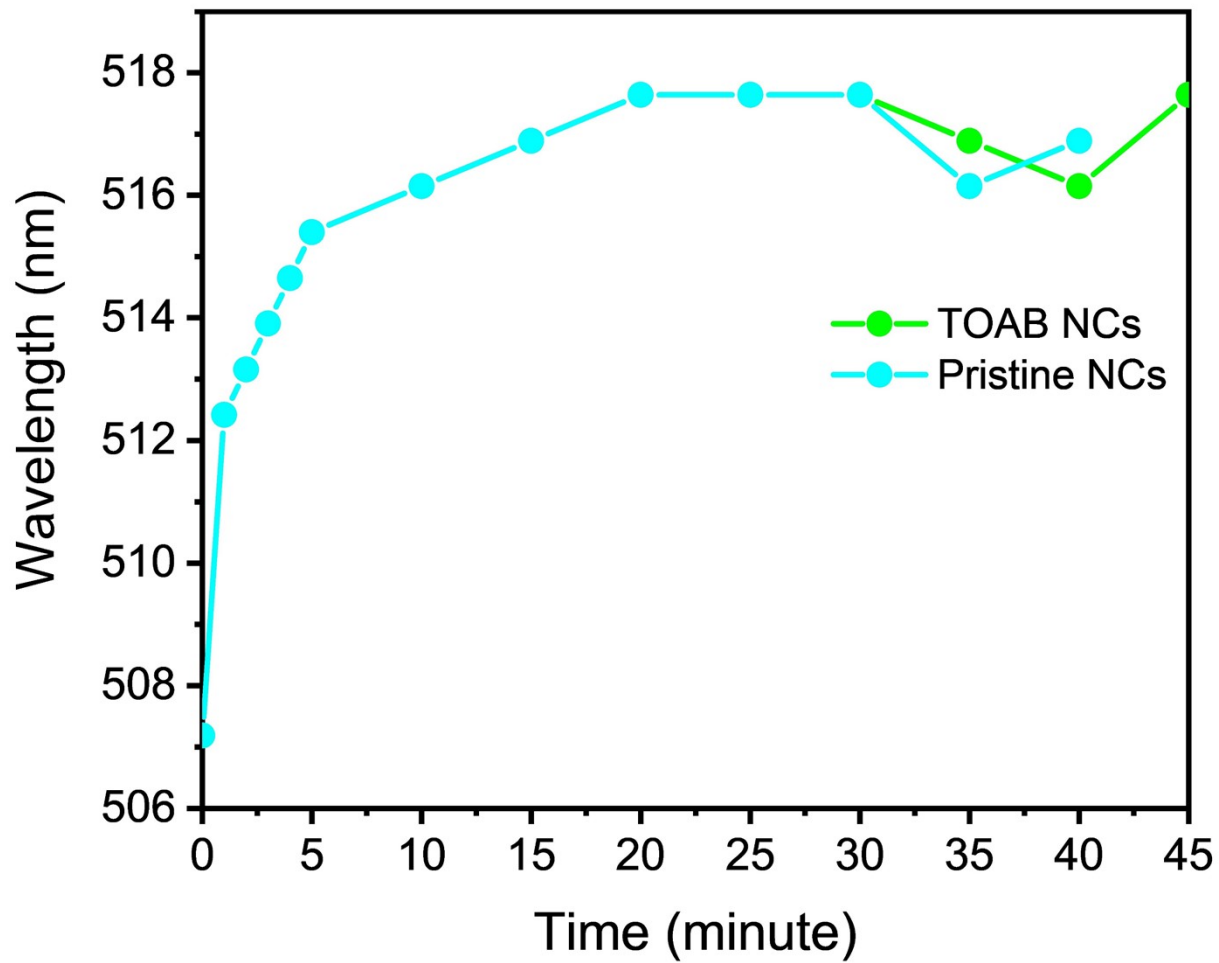

1

2 **Figure S9.** Changes in PL peak positions of pristine and TOAB passivated NCs during  
3 nucleation and growth stage and ligand exchange stage.

4

5

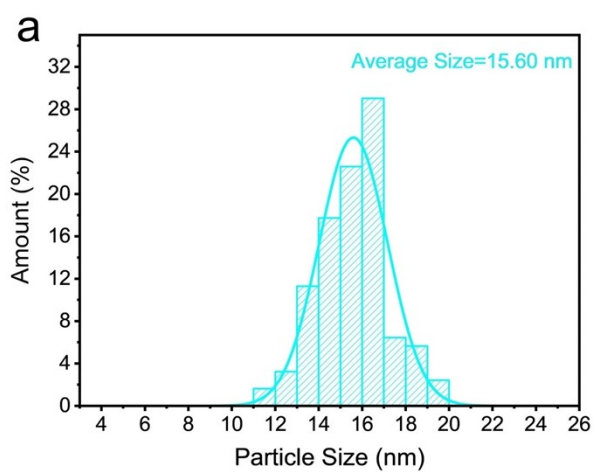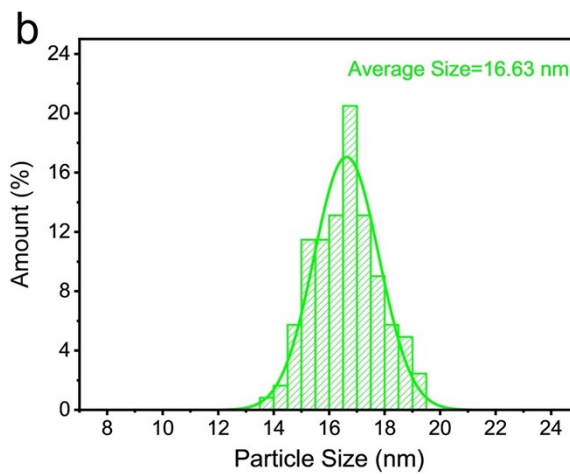

1

2 **Figure S10.** Particle size distribution histograms of the different CsPbBr<sub>3</sub> NCs. (a) Pristine  
3 CsPbBr<sub>3</sub> and (b) TOAB CsPbBr<sub>3</sub> NCs.

4

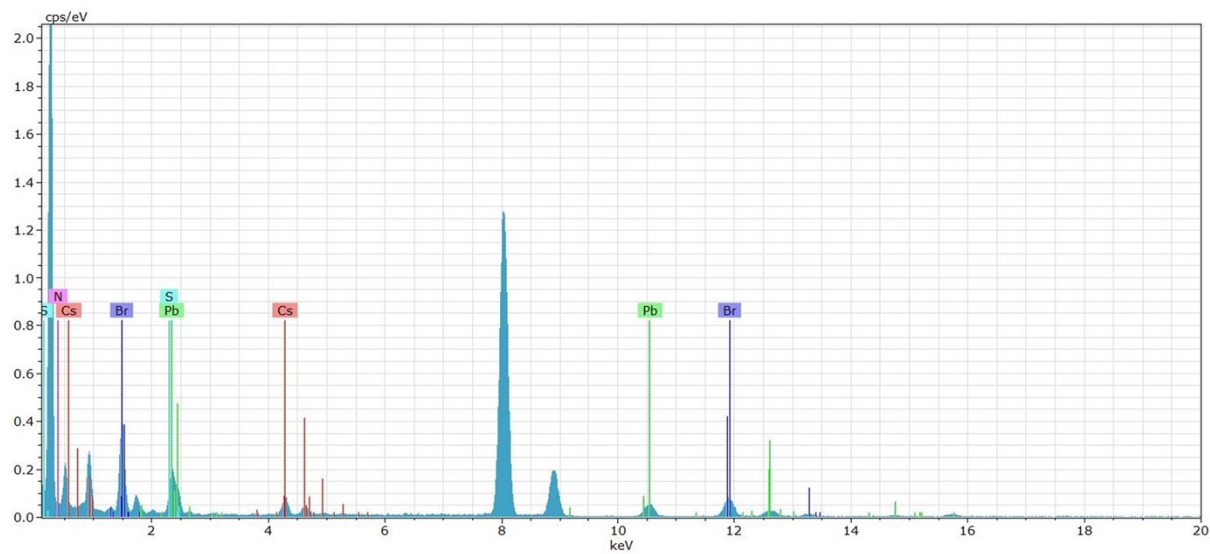

1

2 **Figure S11.** Energy dispersive X-ray spectroscopy of TOAB passivated CsPbBr<sub>3</sub> NCs.

3

4

5

6

7

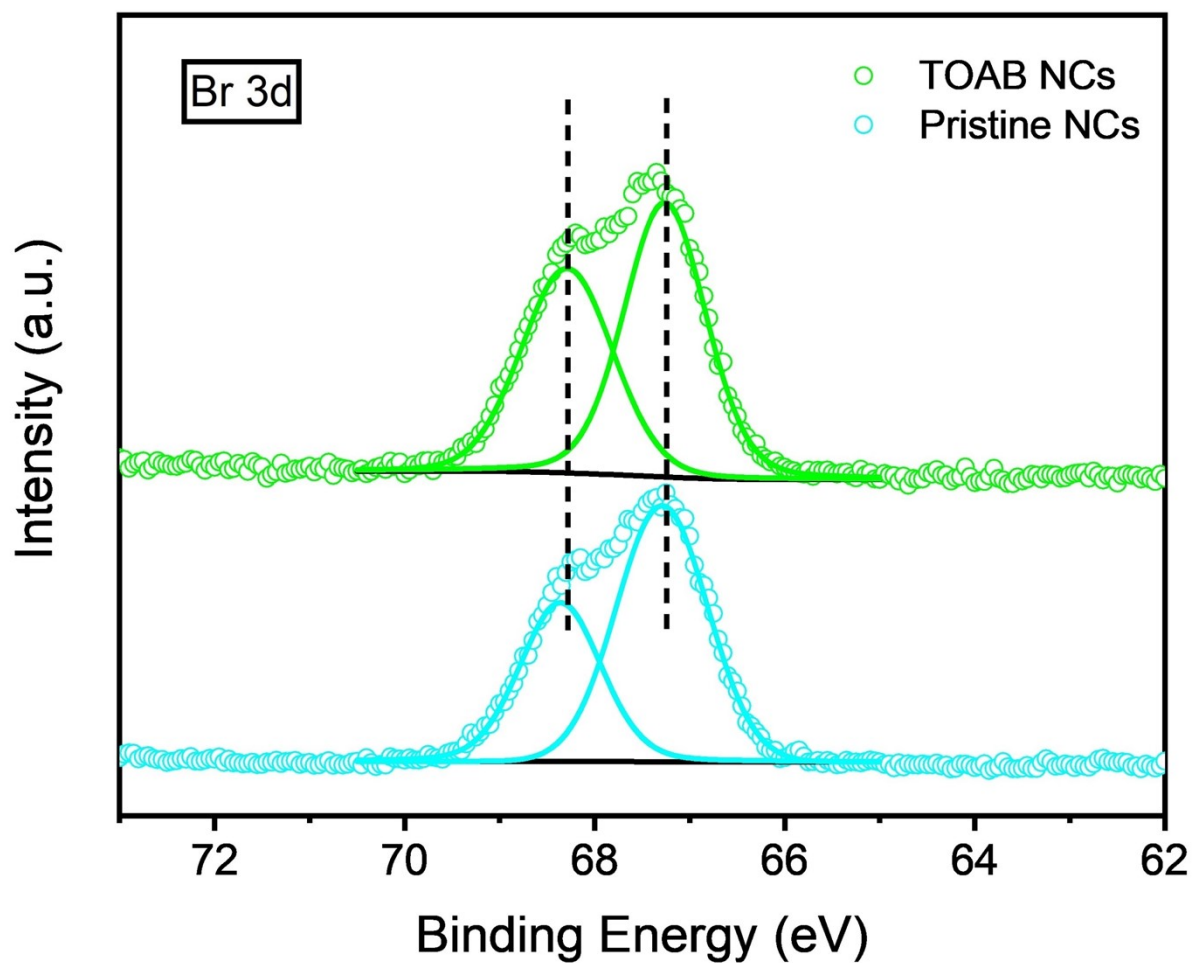

1

2 **Figure S12.** The high-resolution XPS analysis of pristine and TOAB passivated CsPbBr<sub>3</sub> NCs  
3 for Br 3d.

4

5

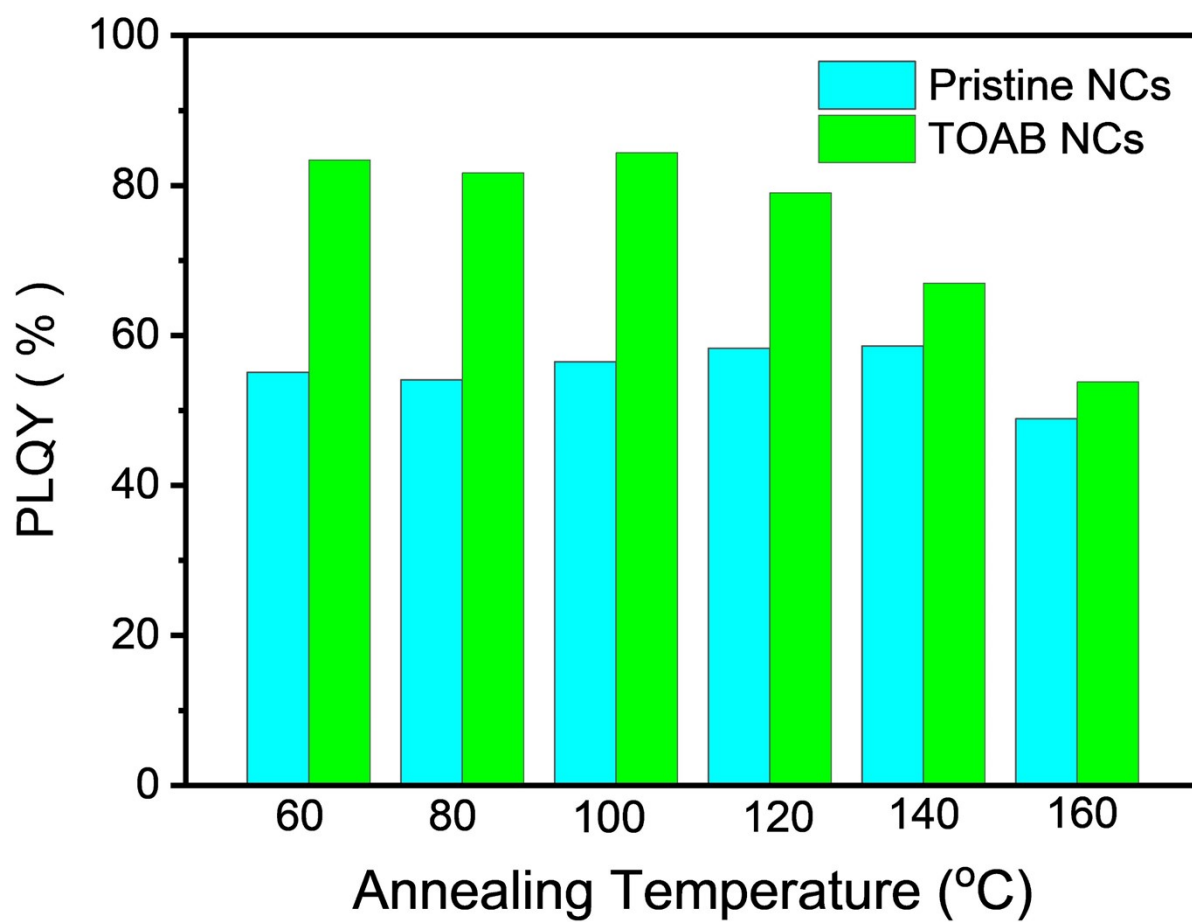

1

2 **Figure S13.** PLQY as a function of annealing temperature for pristine and TOAB passivated  
3 CsPbBr<sub>3</sub> NC films.

4

5

6



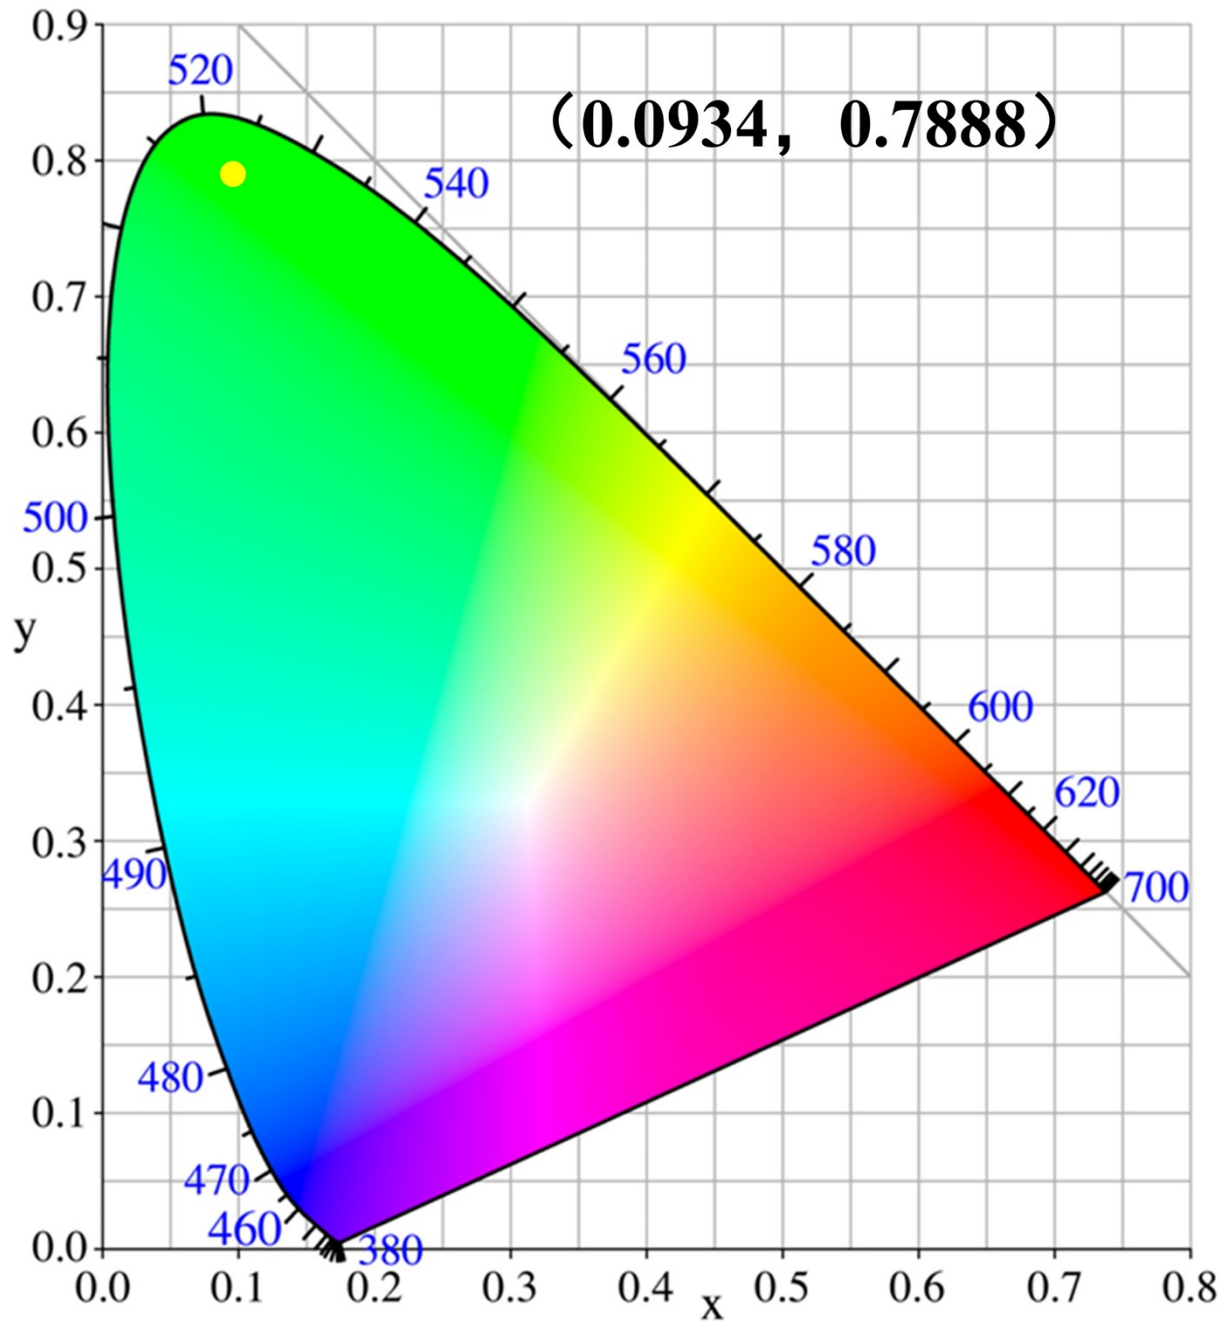

1

2 **Figure S14.** The corresponding Commission Internationale de l' Eclairage (CIE) coordinate  
 3 of the fabricated TOAB passivated CsPbBr<sub>3</sub> NCs based LED.

4

5

6

7

8

9

10

11

1

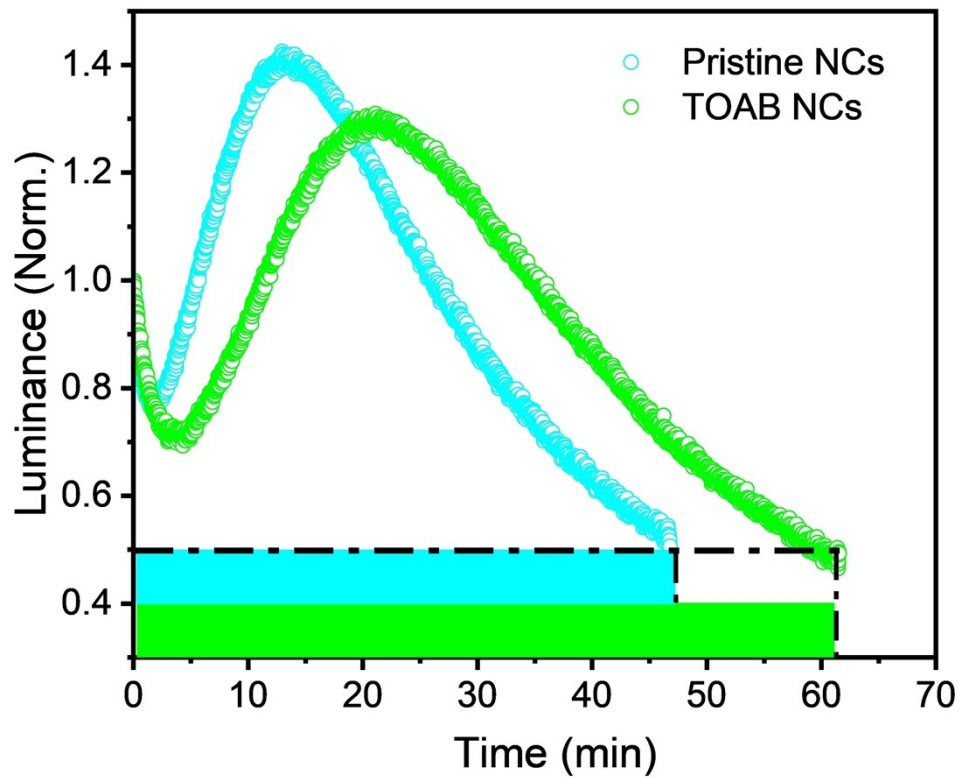

2

3 **Figure S15.** Operation lifetime for the NC LED at constant voltage of 4.5 V.

4

1 **Table S1.** The fitting of the PL decay lifetime for pristine and TOAB passivated CsPbBr<sub>3</sub> NC  
 2 films. The PL was excited at 365 nm and monitored at the maximum emission peak. The  
 3 average PL decay lifetimes ( $\tau_{avg}$ ) were obtained as:

$$4 \quad \tau_{avg} = A + B_1 * \exp(-i/ \tau_1) + B_2 * \exp(-i/ \tau_2) + B_3 * \exp(-i/ \tau_3)$$

5 where B<sub>1</sub>, B<sub>2</sub> and B<sub>3</sub> stand for the statistical weights of the corresponding lifetime components

| Sample              | $\tau_1/ns$        | $\tau_2/ns$        | $\tau_3/ns$         | $\tau_{avg}/ns$    |
|---------------------|--------------------|--------------------|---------------------|--------------------|
| Pristine NCs        | 6.01719 ± 0.467118 | 12.5094 ± 0.400032 | 1.35633 ± 0.0997193 | 5.57018 ± 0.623032 |
| Statistical weights | 62.33 %            | 30.7 %             | 6.97 %              | /                  |
| TOAB NCs            | 4.24276 ± 0.235211 | 10.0799 ± 0.186382 | 43.601 ± 1.68038    | 7.2837 ± 1.70696   |
| Statistical weights | 33.15 %            | 57.4 %             | 9.38 %              | /                  |

6  
7  
8  
9  
10  
11  
12  
13  
14  
15  
16  
17  
18  
19  
20  
21  
22

1 **Table S2.** The calculation results of the radiative and non-radiative recombination rates for  
2 different NC films. The radiative recombination rates ( $k_r$ ) and non-radiative recombination rates  
3 ( $k_{nr}$ ) of different samples are calculated by the formula:

$$PLQY = \frac{k_r}{k_r + k_{nr}}$$

| Sample       | $k_r$ (ns <sup>-1</sup> ) | $k_{nr}$ (ns <sup>-1</sup> ) |
|--------------|---------------------------|------------------------------|
| Pristine NCs | $3.37 \times 10^{-2}$     | $8.43 \times 10^{-3}$        |
| TOAB NCs     | $4.43 \times 10^{-2}$     | $1.37 \times 10^{-3}$        |

4  
5  
6

1 **Table S3.**  $V_{\text{TFL}}$  and trap state densities ( $N_{\text{trap}}$ ) obtained from SCLC measurements for pristine  
2 and TOAB passivated CsPbBr<sub>3</sub> NC thin film.

| <b>Sample</b>       | <b><math>V_{\text{TFL(h)}}</math><br/>(V)</b> | <b><math>V_{\text{TFL(e)}}</math><br/>(V)</b> | <b><math>N_{\text{trap(h)}}</math><br/>(cm<sup>-3</sup>)</b> | <b><math>N_{\text{trap(e)}}</math><br/>(cm<sup>-3</sup>)</b> |
|---------------------|-----------------------------------------------|-----------------------------------------------|--------------------------------------------------------------|--------------------------------------------------------------|
| <b>Pristine NCs</b> | <b>0.41</b>                                   | <b>1.04</b>                                   | <b><math>2.0 \times 10^{14}</math></b>                       | <b><math>6.2 \times 10^{13}</math></b>                       |
| <b>TOAB NCs</b>     | <b>0.33</b>                                   | <b>0.77</b>                                   | <b><math>1.5 \times 10^{14}</math></b>                       | <b><math>5.0 \times 10^{13}</math></b>                       |

3

1 **Table S4.** Carrier mobility obtained from SCLC measurement for pristine and TOAB  
2 passivated CsPbBr<sub>3</sub> NC film.

| <b>Sample</b>       | <b>Hole mobility<br/>(cm<sup>2</sup> V<sup>-1</sup> s<sup>-1</sup>)</b> | <b>Electron mobility<br/>(cm<sup>2</sup> V<sup>-1</sup> s<sup>-1</sup>)</b> |
|---------------------|-------------------------------------------------------------------------|-----------------------------------------------------------------------------|
| <b>Pristine NCs</b> | $5.37 \times 10^{-11}$                                                  | $1.92 \times 10^{-13}$                                                      |
| <b>TOAB NCs</b>     | $3.05 \times 10^{-9}$                                                   | $1.28 \times 10^{-11}$                                                      |

3
